# Histologic safety of transcranial focused ultrasound neuromodulation and magnetic resonance acoustic radiation force imaging in rhesus macaques and sheep

Pooja Gaur<sup>a,\*</sup>, Kerriann M. Casey<sup>b</sup>, Jan Kubanek<sup>c</sup>, Ningrui Li<sup>d</sup>, Morteza Mohammadjavadi<sup>a</sup>, Yamil Saenz<sup>a</sup>, Gary H. Glover<sup>a</sup>, Donna M. Bouley<sup>b</sup>, Kim Butts Pauly<sup>a</sup>

<sup>a</sup>*Department of Radiology, Stanford University, Stanford, CA*

<sup>b</sup>*Department of Comparative Medicine, Stanford University, Stanford, CA*

<sup>c</sup>*Department of Biomedical Engineering, University of Utah, Salt Lake City, UT*

<sup>d</sup>*Department of Electrical Engineering, Stanford University, Stanford, CA*

---

## Abstract

**Background:** Neuromodulation by transcranial focused ultrasound (FUS) offers the potential to non-invasively treat specific brain regions, with treatment location verified by magnetic resonance acoustic radiation force imaging (MR-ARFI).

**Objective:** To investigate the safety of these methods prior to widespread clinical use, we report histologic findings in two large animal models following FUS neuromodulation and MR-ARFI.

**Methods:** Two rhesus macaques and thirteen Dorset sheep were studied. FUS neuromodulation was targeted to the primary visual cortex in rhesus macaques and to subcortical locations, verified by MR-ARFI, in eleven sheep. Both rhesus macaques and five sheep received a single FUS session, whereas six sheep received repeated sessions three to six days apart. The remaining two control sheep did not receive ultrasound but otherwise underwent the same anesthetic and MRI procedures as the eleven experimental sheep. Hematoxylin and eosin-stained sections of brain tissue (harvested zero to eleven days fol-

---

\*Corresponding Author: Pooja Gaur, 1201 Welch Rd, Stanford, CA 94305; Email, [pgaur@stanford.edu](mailto:pgaur@stanford.edu)

lowing FUS) were evaluated for tissue damage at FUS and control locations as well as tissue within the path of the FUS beam. TUNEL staining was used to evaluate for the presence of apoptosis in sheep receiving high dose FUS.

**Results:** No FUS-related pre-mortem histologic findings were observed in the rhesus macaques or in any of the examined sheep. Extravascular red blood cells (RBCs) were present within the meninges of all sheep, regardless of treatment group. Similarly, small aggregates of perivascular RBCs were rarely noted in non-target regions of neural parenchyma of FUS-treated (8/11) and untreated (2/2) sheep. However, no concurrent histologic abnormalities were observed, consistent with RBC extravasation occurring as post-mortem artifact following brain extraction. Sheep within the high dose FUS group were TUNEL-negative at the targeted site of FUS.

**Conclusions:** The absence of FUS-related histologic findings suggests that the neuromodulation and MR-ARFI protocols evaluated do not cause tissue damage.

*Keywords:* focused ultrasound, neuromodulation, magnetic resonance acoustic radiation force imaging, safety

---

## 1 **Introduction**

2 Transcranial focused ultrasound (FUS) delivers targeted ultrasound energy to specific  
3 brain regions without damaging intervening tissue or requiring skull removal (Martin and  
4 Werner, 2013; Lipsman et al., 2014). Importantly, transcranial FUS avoids the risks asso-  
5 ciated with invasive procedures (*e.g.*, bleeding, infection) while maintaining high spatial  
6 resolution and the ability to reach subcortical targets, which limit other neurosurgical and  
7 neurostimulatory methods.

8 A potentially transformative application of transcranial FUS is neuromodulation, which  
9 is thought to be a noninvasive method to explore brain function and circuitry (Tyler et al.,  
10 2018). Neuromodulation uses short bursts of low intensity ultrasound to excite or inhibit  
11 neural activity and can be targeted to subcortical structures at the scale of a few millime-  
12 ters, which cannot be achieved by other noninvasive neuromodulation modalities such  
13 as transcranial magnetic or electrical stimulation (Monti et al., 2016; Naor et al., 2016;  
14 Fomenko et al., 2018). This could enable functional mapping of small nuclei for treatment  
15 targeting and for advancing neuroscience, and offer a possible treatment for neurological  
16 conditions (Kubanek, 2018).

17 Human studies of FUS neuromodulation of cortical and subcortical regions have not  
18 led to detectable tissue changes on post-session MRI or behavioral deficits (Hameroff  
19 et al., 2013; Lee et al., 2015, 2016b; Legon et al., 2014, 2018a,b). As summarized in a  
20 recent review of FUS neuromodulation, fourteen out of fifteen animal publications showed  
21 no abnormal histologic findings (Blackmore et al., 2019). Included in the fourteen studies  
22 were two large animal studies, one in pigs (Dallapiazza et al., 2017) and one in macaques (Ver-  
23 hagen et al., 2019), which found no tissue damage resulting from FUS neuromodulation.  
24 However, one study in sheep raised concerns of microhemorrhage after exposure to pro-  
25 longed, repetitive FUS neuromodulation (Lee et al., 2016c). Thus, the first purpose of this

26 work was to ascertain whether neuromodulation poses a risk of tissue microhemorrhage in  
27 sheep as suggested by Lee *et al.*, with the addition of controls not treated with FUS, and  
28 in rhesus macaques.

29 In addition, FUS neuromodulation is aided by confirmation of FUS targeting in the  
30 brain. MR acoustic radiation force imaging (MR-ARFI) uses a series of very short FUS  
31 bursts at higher intensity to visualize the ultrasound focal spot *in situ*. The ultrasound  
32 pulses slightly displace tissue which, in synchrony with MRI, can be detected as a shift in  
33 image phase (McDannold and Maier, 2008). This phase shift is proportional to the ultra-  
34 sound intensity applied, and therefore can provide a non-invasive metric of the intensity  
35 delivered at the focal spot. MR-ARFI can also be used to assess and compensate for dis-  
36 tortion of the ultrasound through the skull. Proposed clinical applications of MR-ARFI  
37 include validation of treatment targeting (Holbrook *et al.*, 2011; Auboiron *et al.*, 2012),  
38 optimization of transducer focusing through the skull (Larrat *et al.*, 2009; Marsac *et al.*,  
39 2012; Vyas *et al.*, 2014), and assessment of tissue changes during treatment (McDannold  
40 and Maier, 2008; Holbrook *et al.*, 2010; Bitton *et al.*, 2012).

41 Almost no assessments of MR-ARFI safety have been reported. Two reports of *in vivo*  
42 MR-ARFI in the body, one in rabbits (Huang *et al.*, 2009) and one in pigs (Holbrook *et al.*,  
43 2011), have been published but did not discuss safety. One study involving transcranial  
44 MR-ARFI in two macaques has been published, but did not include histology (Chaplin  
45 *et al.*, 2019). To our knowledge, the only report of MR-ARFI safety is from a study  
46 that investigated histology after transcranial MR-ARFI in one rodent, in which no tissue  
47 damage was observed (Larrat *et al.*, 2009). The second purpose of this work was to assess  
48 tissue safety in a controlled study of transcranial MR-ARFI in sheep.

49 We evaluate histology in brain tissue following FUS neuromodulation in the visual  
50 cortex of rhesus macaques, and following neuromodulation and MR-ARFI in subcortical  
51 brain regions in sheep. The sheep histology includes a treatment control group in which

52 no FUS was applied, and internal controls from hemispheres not treated with FUS. Our  
53 neuromodulation protocols included a component similar to those used in human stud-  
54 ies, and to those evaluated by Lee and colleagues. We also investigated a broader range  
55 of intensity values and repeated number of FUS bursts, exceeding those values typically  
56 used in human protocols as well as those used in the study by Lee *et al.* Our findings  
57 provide important information for subsequent studies involving FUS neuromodulation or  
58 MR-ARFI.

## 59 **Materials and Methods**

60 All animal experiments were performed with institutional approval from the Stanford  
61 University Administrative Panel on Laboratory Animal Care.

### 62 *Rhesus macaque study*

63 Two 4-year-old adult male rhesus macaques (4.6 kg and 4.8 kg) were acquired from  
64 the Wisconsin National Primate Research Center in November 2016. Both non-human  
65 primates (NHP-1 and NHP-2) were clinically healthy on physical examination and were  
66 seronegative for the following pathogens: *Mycobacterium tuberculosis*, simian immunod-  
67 efficiency virus, and simian T-lymphotrophic virus type 1 and 2. One animal was seropos-  
68 itive for simian retrovirus. Animals were housed in indoor caging and maintained on a  
69 12:12 hr light:dark cycle in an AAALAC-accredited facility. Animals were fed a com-  
70 mercial primate diet (Teklad Global 20% Protein Primate Diet 2050, Envigo, Madison,  
71 WI) supplemented with fresh produce, and had unrestricted access to water. Figure 1(a)  
72 summarizes study characteristics.

### 73 *Anesthesia and preparation*

74 Both animals were sedated with ketamine (4 mg/kg, intramuscularly) and dexmedeto-  
75 midine (0.02 mg/kg, intramuscularly) and anesthetized with 2-3% isoflurane throughout

76 the FUS procedure. The hair was shaved from the back of the head prior to transducer  
77 placement.

### 78 *Focused ultrasound*

79 A single-element, 270 kHz focused ultrasound transducer fitted with an agar-filled  
80 cone was positioned at the back of the head and coupled with degassed ultrasound gel as  
81 illustrated in Fig. 1(b) (H-115, Sonic Concepts, Bothell, WA).

82 FUS was targeted to four regions in the visual cortex as shown in Fig. 1(c). A coupling  
83 cone was used such that the ultrasound focus was positioned at the surface of the brain (5  
84 cm length from transducer). The focal pressure half-width was approximately 17 mm in  
85 the axial direction and 6 mm in the lateral direction. The lower two focal spot locations  
86 were placed 2 mm above the center of the inion and spaced bilaterally by 15 mm (NHP-1)  
87 and 20 mm (NHP-2). The upper two focal spot locations were located directly above at 10  
88 mm (NHP-1) or 15 mm (NHP-2).

89 FUS was applied in 300 ms pulsed (50% duty cycle) bursts occurring every 1 s for  
90 a total of 500 stimuli, as illustrated in Fig. 1(d). One 8.3 min FUS trial (comprising  
91 500 FUS bursts) was applied to each of the four neuromodulation locations. Free-field  
92 stimulus pressure levels corresponded to 0.5, 1, 2, and 4 MPa as measured in a water tank  
93 by fiberoptic hydrophone (Precision Acoustics, Dorset, UK), in order to sample a range  
94 of values. *In situ* intensity was estimated after assuming approximately 40% pressure loss  
95 through the macaque skull, based on reports from a previous study (Deffieux et al., 2013).  
96 One spatial peak-temporal average intensity ( $I_{SPTA}$ ) level was applied per location, with  
97 estimated *in situ* values of 0.4 (top) and 1.6 (bottom) W/cm<sup>2</sup> on the right hemisphere and  
98 6.4 (top) and 25.8 (bottom) W/cm<sup>2</sup> on the left hemisphere, as illustrated in Fig. 1(c).

99 *Fixation and histopathology*

100 Thirty minutes following FUS, the animals were anesthetized to a surgical plane with  
101 5% isoflurane and initially perfused with 0.25-0.5 liters of saline. Next, the macaques  
102 were perfused with 4 liters of 3.5% to 4% paraformaldehyde in 0.1 M phosphate buffer at  
103 high pressure for 2-3 minutes (2 liters) and at low pressure (2 liters) for one hour. Lastly,  
104 they were perfused with 1-1.25 liters each of 10%, 20%, and 30% sucrose solutions at  
105 high pressure for cryoprotection. The skull was removed using an autopsy saw (Shandon,  
106 ThermoFisher Scientific, No. 10000) and the brain was extracted. The primary visual  
107 cortex was segmented from the remaining cortex by making a coronal cut 2 mm posterior  
108 to the lunate sulcus. Brains were then immersion-fixed in 10% neutral buffered formalin  
109 for 7-10 days. Formalin-fixed tissues were then processed routinely, embedded in paraffin,  
110 sectioned at 7  $\mu\text{m}$ , and stained with hematoxylin and eosin (H&E). Three coronal tissue  
111 sections were obtained from each hemisphere of the visual cortex, resulting in six total  
112 sections per macaque (Fig. 1(c)). Each pair of left and right sections captured a cross-  
113 section of all four focal spot beams and covered the full extent of each hemisphere. The  
114 first two section pairs were obtained near the surface of the brain, in the region of the focal  
115 peak, spaced about 4 mm apart. The third section pair was located about 3 mm beyond  
116 the half-max intensity of the focus, at an approximate depth of 2 cm from the cortical  
117 surface. Slides were blindly reviewed by a board-certified veterinary pathologist (DB)  
118 for the presence of necrosis, apoptosis, edema, hemorrhage, inflammation, and neuropil  
119 rarefaction.

120 *Sheep study*

121 Thirteen male Dorset sheep weighing 22 to 36 kg were included in the study. Eleven  
122 underwent transcranial FUS. Two animals did not receive ultrasound but otherwise under-  
123 went the same experimental procedures.

124 Sheep were divided into FUS (n=11) and control (n=2) study groups. Animals that  
125 received FUS were subdivided into four groups as follows: acute (n=2; euthanized zero  
126 days after FUS study), delayed (n=3; euthanized four to seven days after FUS study),  
127 repeated (n=3; underwent FUS again three to six days after the first FUS session, and  
128 euthanized four days after the last FUS study), and high dose (n=3; received multiple  
129 FUS sessions with prolonged application of FUS on the last day of study, and euthanized  
130 four days later). Both sheep in the control group underwent multiple days of MRI study.  
131 The two sheep in the acute FUS group and one sheep in the delayed FUS group also  
132 underwent MRI study on one or more days prior to the FUS session. Study characteristics  
133 are summarized in Fig. 2(a).

#### 134 *Anesthesia and preparation*

135 Sheep were fasted for 24 hours prior to the study and then sedated with tiletamine and  
136 zolazepam (Telazol, Lederele Parenterals, Carolina, Puerto Rico) at 4 mg/kg, intramuscu-  
137 larly. Anesthesia was induced with a combination of 3% isoflurane in oxygen delivered  
138 by facemask and telazol in a continuous rate of infusion. All animals were orotracheally  
139 intubated and anesthesia was maintained with 1% to 3% isoflurane in oxygen with MRI  
140 conditional mechanical ventilation (Omni-Vent Series D, Allied Healthcare Products, St.  
141 Louis, MO) to maintain end-tidal carbon dioxide between 35 mm Hg and 45 mm Hg.  
142 Stomach tubes were placed after intubation to resolve gaseous distension and prevent re-  
143 gurgitation. Venous and arterial catheters were placed percutaneously for drug and fluid  
144 administration and blood pressure monitoring. Lactated Ringer's solution (Abbott Labo-  
145 ratories, Abbott Park, IL) was administered intravenously at approximately 10 mL/kg/hr  
146 throughout anesthesia. The top of the head was shaved and treated with a depilatory cream  
147 for hair removal.



148 *Physiological monitoring*

149 Serial samples of hematocrit and arterial blood gases were taken from the auricular  
150 arterial catheter. Blood gas samples were analyzed immediately on a calibrated blood gas  
151 analyzer (i-STAT, Abbott Point of Care, East Windsor, NJ). Pulse oximetry measurements  
152 and capnography were performed continuously during anesthesia (Expression MR400,  
153 Philips Healthcare, Vantaa, Finland).

154 *MR-guided focused ultrasound*

155 MR-guided focused ultrasound studies were conducted using a 1024 element, 550 kHz  
156 focused ultrasound transducer fitted with a membrane containing chilled, degassed water  
157 (ExAblate 2100, Insightec Ltd., Haifa, Israel). The transducer was positioned above the  
158 head with degassed ultrasound gel for acoustic coupling (Fig. 2(b)).

159 Acoustic coupling and focal spot location were verified by MR-ARFI in the eleven  
160 sheep that underwent transcranial FUS. Figure 2(d) illustrates the MR-ARFI protocol in  
161 which FUS was on for 16 ms bursts within a 500 ms window (corresponding to the MR  
162 repetition time) over a period of 1.2 min. Each application of MR-ARFI comprised 128  
163 FUS bursts. Figure 2(e-g) illustrates neuromodulation protocols, in which FUS was on for  
164 200-300 ms bursts every 1 s with continuous wave (Fig. 2(f)) or pulsed (50% duty cycle)  
165 ultrasound (Fig. 2(e,g)). Each neuromodulation application comprised 120 (Fig. 2(e)) or  
166 600 FUS bursts (Fig. 2(f,g)) over a period of 6 (Fig. 2(e)) or 20 minutes (Fig. 2(f,g)).  
167 The protocols applied for each sheep are reported in Fig. 2(a). FUS pulse timing was  
168 controlled by Eprime scripts (Psychology Software Tools, Pittsburgh, PA).

169 Multiple MR-ARFI and neuromodulation trials were administered consecutively to  
170 investigate the safety of repeated FUS sonications. The within-session timing of FUS  
171 application is illustrated in Fig. 3 for each sheep. Applied acoustic powers ranged from  
172 127.5-195.5 W for MR-ARFI and 2-34 W for neuromodulation, and are summarized in

173 Fig. 4(a) and Fig. 4(d), respectively, for each sheep. Neuromodulation acoustic powers  
174 were selected to result in at least  $5.7 \text{ W/cm}^2$   $I_{SPTA}$  *in situ*, to replicate acoustic intensities  
175 applied in a study which reported tissue damage in sheep (Lee et al., 2016c), but to also  
176 include a broader intensity range to evaluate potential effects at higher levels.

177 MR-ARFI and neuromodulation were targeted to 1-6 and 1-4 subcortical locations,  
178 respectively. The neuromodulation study measured visual evoked potentials using scalp  
179 electrodes in response to external stimulation (flashing lights) as well as during focused  
180 ultrasound sonication targeted to the visual pathway (lateral geniculate nucleus), the results  
181 of which are presented elsewhere (Mohammadjavadi et al., 2019). The lateral geniculate  
182 nucleus was a common neuromodulation location for all sheep, with additional focal spots  
183 typically located in planes approximately 10, 15, and 20 mm rostral and 10 mm caudal to  
184 the lateral geniculate nucleus. The focal pressure half-width was approximately 20 mm in  
185 the axial direction and 3.5 mm in the lateral direction. Figure 2(c) shows an example of  
186 targeted focal spot locations (sheep 9). The total number of FUS bursts applied to each  
187 targeted location are illustrated for MR-ARFI in Fig. 4(g) and for neuromodulation in  
188 Fig. 4(h), for each sheep. For the sheep in the repeated and high dose FUS groups, FUS  
189 locations were revisited for MR-ARFI and neuromodulation on multiple days. Two sheep  
190 had locations that were targeted both for MR-ARFI and neuromodulation on alternate days  
191 (two locations for sheep 8 and one location for sheep 9). Additionally, the three sheep in  
192 the high dose group each had one location that received MR-ARFI and neuromodulation  
193 during the same session. At the conclusion of the study, a high number of consecutive  
194 MR-ARFI repetitions were targeted to a single location in the high dose group, bringing  
195 the total number of MR-ARFI repetitions to 25, 44, and 70 at a single location (sheep  
196 11, 12, and 13, respectively). Target locations were in the left hemisphere for acute and  
197 delayed groups, and bilateral for the repeated and high dose FUS groups.

198 *MR imaging*

199 MR-guided focused ultrasound studies were performed at 3T (Signa Excite, GE Health-  
200 care, Milwaukee, WI) using a quadrature head coil. A high resolution T2-weighted se-  
201 quence was acquired for treatment planning with 2.5 s repetition time, 72 ms echo time,  
202 22 cm isotropic field of view, and  $256 \times 192$  acquisition matrix. MR-ARFI was performed  
203 using a spin echo sequence with repeated bipolar motion encoding gradients, 2DFT read-  
204 out, 500 ms repetition time, 39 ms echo time,  $20 \times 20 \times 0.7$  cm<sup>3</sup> field of view, and  $256 \times 128$   
205 acquisition matrix (Bitton et al., 2012). Focused ultrasound application spanned from the  
206 second lobe of the first bipolar through the first lobe of the second bipolar motion encod-  
207 ing gradient. Images of the focal spot encoded by MR-ARFI were calculated by complex  
208 phase difference of two acquisitions with alternating motion encoding gradient polarities.

209 *Histopathology and TUNEL*

210 Animals were euthanized with a barbiturate overdose of 1 ml per 10 pounds of body  
211 weight of euthanasia solution (390 mg/mL pentobarbital and 50 mg/kg phenytoin, Virbac,  
212 St Louis, MO). Cardiac arrest was confirmed by auscultation. Skulls were removed via  
213 an autopsy saw (Shandon, ThermoFisher Scientific, No. 10000) and brains were extracted  
214 and immersion-fixed in 10% neutral buffered formalin for at least 10 days. Following fixa-  
215 tion, the entirety of the brain was sectioned at approximately 3 mm intervals in the coronal  
216 plane. Brain regions were selected for histologic evaluation based on gross tissue compar-  
217 ison to MRI locations of FUS targets. Coronal tissue sections included the FUS target and  
218 all tissue dorsal to this region (to evaluate for potential cortical effects from skull heating  
219 and any effects within the FUS beam path). Additional tissue sections at distances of +/-  
220 3 mm from FUS targets were evaluated histologically (Fig. 2(c)). Tissue sections were  
221 also evaluated from contralateral, untreated hemispheres of acute and delayed FUS groups  
222 (internal controls). In control sheep, tissue sections were taken from the left and right

223 hemispheres in locations anatomically similar to the FUS group. Formalin-fixed tissues  
224 were processed routinely, embedded in paraffin, sectioned at 5  $\mu\text{m}$ , and stained with H&E.  
225 Slides were blindly reviewed by a board-certified veterinary pathologist (KMC). Particular  
226 attention was paid to the presence or absence of hemorrhage, as well as pre-mortem tissue  
227 responses to damage (*i.e.*, necrosis, red blood cell engulfment (erythrophagocytosis), and  
228 intracellular red blood cell breakdown (hemosiderin-laden macrophages)). Additionally,  
229 terminal deoxynucleotidyl transferase-mediated dUTP-biotin nick end labeling (TUNEL)  
230 staining (ApopTag kit; Millipore, Temecula, CA) was performed according to manufac-  
231 turer's instruction on tissue sections corresponding to locations receiving the highest num-  
232 ber of MR-ARFI repetitions from sheep in the high dose group.

### 233 *Hydrophone measurements*

234 *Ex vivo* skull caps from each sheep were degassed and placed in front of the focused  
235 ultrasound transducer array in a tank with degassed water. A fiberoptic hydrophone was  
236 positioned at the ultrasound focus to measure peak negative pressure transmitted through  
237 each skull cap to obtain an *in situ* intensity estimate for each acoustic power level applied  
238 *in vivo* (Precision Acoustics, Dorset, UK).

## 239 **Results**

### 240 *Rhesus macaque study*

#### 241 *Histopathology*

242 Post-mortem examination of the extracted brain tissue did not reveal any macroscopic  
243 damage. A total of 12 H&E slides of brain tissue were evaluated: six slides, sampling left  
244 and right hemispheres, from two macaques. Histologic evaluation of tissue containing the  
245 focused ultrasound beam path from the four targeted locations did not show any evidence

246 of damage in either macaque (Fig. S1). Specifically evaluated parameters included necro-  
247 sis, apoptosis, edema, hemorrhage, inflammation, and neuropil rarefaction. Red blood cell  
248 extravasation could not be evaluated as these animals were perfused (*i.e.*, exsanguinated)  
249 prior to histologic examination.

### 250 *Sheep study*

251 Estimates of *in situ* ultrasound intensity were obtained based on hydrophone measure-  
252 ments of pressure transmitted through each *ex vivo* skull cap. The acoustic power levels  
253 applied during the study corresponded to *in situ* peak pressure estimates of 1.7-3.6 MPa for  
254 MR-ARFI (Fig. 4(b)) and 0.25-0.9 MPa for neuromodulation (Fig. 4(e)), and *in situ*  $I_{SPTA}$   
255 estimates ranging from 5.6-26.5 W/cm<sup>2</sup> for MR-ARFI (Fig. 4(c)) and 0.6-13.8 W/cm<sup>2</sup> for  
256 neuromodulation (Fig. 4(f)).

257 The number of FUS bursts applied to each location are stratified by the estimated  
258 *in situ* peak pressure and intensity of the sonication as shown in Fig. 5 for MR-ARFI  
259 and neuromodulation. Observations at multiple locations of the same number of bursts  
260 and estimated pressure or intensity are indicated by the color scale. High peak pressure  
261 values for MR-ARFI sonications were applied for short durations of 16 ms within the pulse  
262 repetition period, resulting in temporal average intensities that were similar to or slightly  
263 higher than the neuromodulation  $I_{SPTA}$  estimates, despite much lower neuromodulation  
264 peak pressures. In all sheep, transcranial FUS was confirmed by visualization of the focal  
265 spot by MR-ARFI with targeting to at least one subcortical location (Fig 6).

### 266 *Histopathology*

267 Overall, a total of 183 H&E slides of brain tissue from 13 sheep were evaluated for  
268 histologic damage. Of these, 128/183 received direct FUS exposure (sampled at the focal  
269 spot location and/or 3 mm rostral/caudal), 19/183 were internal controls (*i.e.*, contralateral  
270 hemisphere to that which received FUS), and 36/183 were experimental controls (*i.e.*, no

271 FUS to either hemisphere). Overall, no FUS-related pre-mortem histologic findings were  
272 noted in any of the examined slides. Figure 7 summarizes the frequency of post-mortem  
273 histologic findings across study groups. The presence of each finding is reported for each  
274 hemisphere, where green boxes outline hemispheres that received FUS. The color scale  
275 represents the percentage of H&E slides that were positive for each histologic feature.

276 Histologic findings were limited to post-mortem red blood cell extravasation (meningeal  
277 or parenchymal) following brain extraction. Red blood cell extravasation was never ob-  
278 served at the precise sites of FUS targets. When present, parenchymal post-mortem red  
279 blood cell extravasations were randomly distributed within tissues distant to the FUS  
280 target. The number of incidences (foci) of scattered red blood cell extravasation in the  
281 parenchyma was quantified for each tissue section (Fig. 8). Our results suggest the rate  
282 of parenchymal red blood cell extravasation did not increase with FUS, but equivalence  
283 tests between FUS and control sections were not statistically significant. We performed a  
284 cluster-adjusted logistic regression and found the risk of red blood cell extravasation in the  
285 meninges is equivalent within +/- 10% with  $p < 0.05$  between FUS treated and untreated  
286 tissue sections.

### 287 *Acute FUS group*

288 Histologically, sheep euthanized less than 24 hours ( $n=2$ ) following MRI and FUS ex-  
289 hibited red blood cell extravasation within the meninges (2/2) as well as rare perivascular  
290 red blood cells within neural parenchyma (2/2), regardless of hemispheric location (left vs  
291 right) and FUS application (Fig. 9(a,b,h,i)). No concurrent pre-mortem histologic find-  
292 ings (*i.e.*, necrosis, red blood cell engulfment (erythrophagocytosis), and intracellular red  
293 blood cell breakdown (hemosiderin-laden macrophages)) were noted in areas of red blood  
294 cell extravasation. However, acute hemorrhage can be histologically indistinguishable  
295 from post-mortem red blood cell extravasation (Finnie, 2016). Thus, a delayed euthana-

296 sia timepoint was established to confirm that red blood cell extravasation was indeed a  
297 post-mortem tissue extraction artifact rather than true pre-mortem hemorrhage.

### 298 *Delayed FUS group*

299 In order to confirm that extravascular red blood cells seen in the acute FUS group re-  
300 flected artifact following post-mortem tissue extraction, a delayed euthanasia timepoint  
301 was established (4- to 7-days post-FUS). In general, approximately 2- to 4-days follow-  
302 ing meningeal (or subarachnoid) hemorrhage, a normal response to hemorrhage should  
303 include erythrophagocytosis, while hemosiderin-laden macrophages are typically seen  
304 around 6- to 7-days post-hemorrhage (Finnie, 2016; Rao et al., 2016). In our study, sheep  
305 euthanized 96-168 following MRI and FUS exhibited extravascular red blood cells within  
306 the meninges (3/3) and rare extravascular red blood cells within neural parenchyma (2/3),  
307 regardless of hemispheric location (left vs right) and FUS application (Fig. 9(c,d,j,k)).  
308 Furthermore, at 96-168 hours following FUS, there was still no evidence of concurrent  
309 histologic abnormalities (such as those listed above) in regions of red blood cell extrava-  
310 sation.

### 311 *Repeated FUS group*

312 Tissue from sheep treated with FUS over multiple days exhibited extravascular red  
313 blood cells within the meninges (3/3) similar to the other groups. Occasional perivascu-  
314 lar red blood cells were observed bilaterally within the neural parenchyma for one sheep  
315 (sheep 10; Fig. 9(e,l)). No other concurrent pre-mortem histologic findings (*i.e.*, necrosis,  
316 macrophage infiltration, red blood cell engulfment (erythrophagocytosis), and intracellular  
317 red blood cell breakdown (hemosiderin-laden macrophages)) were observed.

318 *High dose FUS group*

319 Sheep in the high dose group received prolonged consecutive MR-ARFI sonication to  
320 a single location on the last day of study, with the total number of MR-ARFI applications  
321 at the high dose location (25, 44, and 70 repetitions for sheep 11, 12, and 13, respectively)  
322 greatly exceeding the highest number of repetitions applied within the other FUS groups  
323 (8 repetitions for sheep 10). Neuromodulation sonications were similar to those applied  
324 in the other FUS groups. As with sheep in other groups, extravascular red blood cells  
325 were noted in the meninges (3/3) and rarely in parenchyma (3/3) (Fig. 9(f,m)). No other  
326 histologic findings accompanied extravascular red blood cells. Additionally, no histologic  
327 findings were observed at the high dose location or other locations targeted with FUS in  
328 any sheep. TUNEL results confirm no evidence of apoptosis at the high dose location for  
329 all three sheep (Fig. S2).

330 *Control group*

331 Control animals that only underwent the MRI procedure (*i.e.*, no FUS) also exhibited  
332 red blood cell extravasation within the meninges (2/2) and rarely within neural parenchyma  
333 (2/2) (Fig. 9(g,n)). As with sheep that underwent FUS, no evidence of concurrent pre-  
334 mortem histologic findings (*i.e.*, necrosis, macrophage infiltration, red blood cell engulf-  
335 ment (erythrophagocytosis), and intracellular red blood cell breakdown (hemosiderin-  
336 laden macrophages)) was observed in areas of red blood cell extravasation.

337 **Discussion**

338 The results of this study suggest that the transcranial MR-ARFI and neuromodulation  
339 FUS protocols evaluated did not result in histologic tissue damage. No histologic ab-  
340 normalities were observed at the site of FUS targets in either rhesus macaques or sheep,



341 although post-mortem parenchymal red blood cell extravasation was observed in other  
342 brain regions of sheep tissue sections (*i.e.*, away from the focal spot).

343 Histologic findings were similar in both FUS treated and untreated hemispheres, as  
344 well as in control groups. Tissue sections from all sheep exhibited red blood cell ex-  
345 travasation in the meninges regardless of FUS application, treated hemisphere, or survival  
346 time (Fig 7). Through the process of post-mortem skull removal, meningeal blood ves-  
347 sels (*e.g.*, dural) are frequently ruptured resulting in the observed meningeal red blood  
348 cell extravasation. Furthermore, vibrations during extraction are strong enough to result  
349 in rare extravasations of red blood cells from parenchymal vessels. Multiple sections from  
350 both FUS (treated and untreated hemispheres) and control groups exhibited perivascular  
351 red blood cell extravasation in cortical tissue regions separate from those identified as  
352 FUS targets (Fig 8). No macrophage infiltration, erythrophagocytosis, hemosiderin-laden  
353 macrophages, tissue necrosis, or other indicators of tissue reactivity to damage were ob-  
354 served (Fig. 7), confirming post-mortem artifact.

355 Selecting appropriate euthanasia time points is crucial to interpreting histologic find-  
356 ings. At time points less than 24 hours, true small volume hemorrhage can be indis-  
357 tinguishable from tissue damage incurred during post-mortem brain extraction (Maxie,  
358 2007). Following 72 hours, true pre-mortem hemorrhage should exhibit concurrent macrophage  
359 infiltration, erythrophagocytosis, and/or hemosiderin-laden macrophages (Rao et al., 2016).  
360 The absence of this expected tissue reactivity within our sheep cohort confirm that meningeal  
361 and extravascular red blood cells seen across both hemispheres and experimental groups  
362 were artifact due to post-mortem tissue extraction.

363 We evaluated *in situ* intensities similar to and slightly higher than previously reported  
364  $I_{SPTA}$  values of up to 4.4 W/cm<sup>2</sup> in humans, 9.5 W/cm<sup>2</sup> in macaques, and 6.7 W/cm<sup>2</sup> in  
365 sheep (Lee et al., 2016a; Verhagen et al., 2019; Lee et al., 2016c). The study in sheep  
366 reported microhemorrhage on H&E-stained tissue following 500 or more bursts of neu-

367 romodulation (300 ms long burst duration repeated in 1 second intervals at 50% duty  
368 cycle) at 3.3-5.7 W/cm<sup>2</sup>, but not at 6.7 W/cm<sup>2</sup>  $I_{SPTA}$ . Of fifteen publications assessing  
369 histology after neuromodulation, this was the only one to report abnormal findings, as  
370 summarized in a recent review of the ultrasound neuromodulation literature (Blackmore  
371 et al., 2019). However, because these foci of microhemorrhage were identified 4-64 days  
372 following treatment, with an absence of concurrent parenchymal reaction, we speculate  
373 that this finding may in fact be a post-mortem artifact.

374 In our study, repeated FUS neuromodulation and MR-ARFI sonications to the same fo-  
375 cal spot location, either within one session or on multiple days, at various intensity levels,  
376 were not accompanied by histologic damage. We evaluated histology following a similar  
377 neuromodulation FUS protocol as Lee *et al.* In macaques, there was no tissue damage fol-  
378 lowing 500 bursts at tissue locations receiving intensities of 0.4, 1.6, 6.4, and 25.8 W/cm<sup>2</sup>  
379  $I_{SPTA}$ . Sonications of between 240 and 4800 bursts per location at intensity levels ranging  
380 from 0.6 and 13.8 W/cm<sup>2</sup>  $I_{SPTA}$  did not result in pre-mortem damage in sheep. Further-  
381 more, we evaluated histology from locations receiving between 128 and 8192 MR-ARFI  
382 bursts at a given intensity level, ranging from 5.6 and 26.5 W/cm<sup>2</sup>  $I_{SPTA}$ , and found no  
383 pre-mortem damage from either H&E- or TUNEL-stained tissue. One limitation of this  
384 study is that we did not detect tissue damage with either MR-ARFI or neuromodulation  
385 FUS.

386 Skull bone absorbs and dephases ultrasound which introduces a risk of cortical heat-  
387 ing, and has been demonstrated to contribute to variations in FUS treatment across pa-  
388 tients (Vyas et al., 2016). In our study, hydrophone measurements through *ex vivo* sheep  
389 skull caps resulted in a range of estimated *in situ* intensities, even when similar acoustic  
390 power levels were applied (Fig 4). Particular attention has been paid to thermal rise during  
391 neuromodulation, and a recent retrospective study has reported a simulated cortical tem-  
392 perature rise of 7°C caused by skull heating during preclinical neuromodulation (Constans

393 et al., 2018). Several contemporary neuromodulation studies in humans have included  
394 assessments that no significant temperature rise in the brain is expected from skull heat-  
395 ing with their protocols (Legon et al., 2014; Mueller et al., 2016; Ai et al., 2018; Legon  
396 et al., 2018a; Verhagen et al., 2019; Attali et al., 2019). We did not observe signs of cor-  
397 tical tissue damage due to skull heating in the rhesus macaque or sheep studies. Prior to  
398 treatment, simulations could be used to optimize FUS parameters to achieve a desired *in*  
399 *situ* intensity, and reduce the risk of tissue heating near bone (Mueller et al., 2016, 2017;  
400 Constans et al., 2018).

## 401 **Conclusions**

402 The transcranial focused ultrasound protocols and equipment tested here did not result  
403 in pre-mortem tissue damage in rhesus macaques or sheep. Our study examined a range of  
404 experimental parameters including number of focal spot locations, number of FUS bursts  
405 applied to each spot, timing between FUS sessions, and applied acoustic intensity, ex-  
406 ceeding the levels previously evaluated in other studies. Furthermore, we demonstrate that  
407 extravascular red blood cells may occur in extracted tissue whether or not focused ultra-  
408 sound is applied. Results underscore the importance of selecting appropriate euthanasia  
409 timepoints and including experimental controls when interpreting histologic findings.

## 410 **Acknowledgements**

411 The authors would like to thank Karla and Kevin Epperson for help with MRI, Ben-  
412 jamin Franco for help with sheep, Rachelle Bitton for help with MR-ARFI, Patrick Ye for  
413 help with hydrophone measurements, Jarrett Rosenberg for help with analyses, Megan Al-  
414 bertelli for help with rhesus macaques, Adrienne Mueller for rhesus macaque perfusions  
415 and tissue harvesting, Elias Godoy for sheep tissue harvesting, the Stanford Comparative

416 Medicine Animal Histology Service Center for slide processing, and Insightec Ltd. for  
417 research support. This work was supported by NIH T32 EB009653, T32 CA009695, R01  
418 MH111825, R01 EB019005, K99 NS100986.

419 **References**

- 420 Ai L, Bansal P, Mueller JK, Legon W. Effects of transcranial focused ultrasound on human  
421 primary motor cortex using 7T fMRI: a pilot study. *BMC neuroscience*, 2018;19:56.
- 422 Attali D, Houdouin A, Tanter M, Aubry JF. Thermal safety of transcranial focused simula-  
423 tion in human: retrospective numerical estimation of thermal rise in cortical and subcor-  
424 tical simulation setups. In: 19th International Symposium on Therapeutic Ultrasound,  
425 Barcelona, 2019.
- 426 Auboiroux V, Viallon M, Roland J, Hyacinthe JN, Petrusca L, Morel DR, Goget T, Terraz  
427 S, Gross P, Becker CD, et al. ARFI-prepared MRgHIFU in liver: Simultaneous map-  
428 ping of ARFI-displacement and temperature elevation, using a fast GRE-EPI sequence.  
429 *Magnetic resonance in medicine*, 2012;68:932–946.
- 430 Bitton RR, Kaye E, Dirbas FM, Daniel BL, Pauly KB. Toward MR-guided high intensity  
431 focused ultrasound for presurgical localization: Focused ultrasound lesions in cadaveric  
432 breast tissue. *Journal of magnetic resonance imaging*, 2012;35:1089–1097.
- 433 Blackmore J, Shrivastava S, Sallet J, Butler CR, Cleveland RO. Ultrasound neuromodu-  
434 lation: A review of results, mechanisms and safety. *Ultrasound in medicine & biology*,  
435 2019.
- 436 Chaplin V, Phipps M, Jonathan S, Grissom W, Yang P, Chen L, Caskey C. On the accuracy  
437 of optically tracked transducers for image-guided transcranial ultrasound. *International*  
438 *journal of computer assisted radiology and surgery*, 2019:1–11.
- 439 Constans C, Mateo P, Tanter M, Aubry JF. Potential impact of thermal effects during ul-  
440 trasonic neurostimulation: retrospective numerical estimation of temperature elevation  
441 in seven rodent setups. *Physics in Medicine & Biology*, 2018;63:025003.

- 442 Dallapiazza RF, Timbie KF, Holmberg S, Gatesman J, Lopes MB, Price RJ, Miller GW,  
443 Elias WJ. Noninvasive neuromodulation and thalamic mapping with low-intensity fo-  
444 cused ultrasound. *Journal of neurosurgery*, 2017:1–10.
- 445 Deffieux T, Younan Y, Wattiez N, Tanter M, Pouget P, Aubry JF. Low-intensity focused  
446 ultrasound modulates monkey visuomotor behavior. *Current Biology*, 2013;23:2430–  
447 2433.
- 448 Finnie JW. Forensic pathology of traumatic brain injury. *Veterinary pathology*,  
449 2016;53:962–978.
- 450 Fomenko A, Neudorfer C, Dallapiazza RF, Kalia SK, Lozano AM. Low-intensity ultra-  
451 sound neuromodulation: an overview of mechanisms and emerging human applications.  
452 *Brain stimulation*, 2018.
- 453 Hameroff S, Trakas M, Duffield C, Annabi E, Gerace MB, Boyle P, Lucas A, Amos Q,  
454 Buadu A, Badal JJ. Transcranial ultrasound (tus) effects on mental states: a pilot study.  
455 *Brain stimulation*, 2013;6:409–415.
- 456 Holbrook AB, Ghanouni P, Santos JM, Medan Y, Butts Pauly K. In vivo mr acoustic  
457 radiation force imaging in the porcine liver. *Medical physics*, 2011;38:5081–5089.
- 458 Holbrook AB, Santos JM, Kaye E, Rieke V, Pauly KB. Real-time MR thermometry for  
459 monitoring HIFU ablations of the liver. *Magnetic Resonance in Medicine*, 2010;63:365–  
460 373.
- 461 Huang Y, Curiel L, Kukic A, Plewes DB, Chopra R, Hynynen K. Mr acoustic radiation  
462 force imaging: in vivo comparison to ultrasound motion tracking. *Medical physics*,  
463 2009;36:2016–2020.

- 464 Kubanek J. Neuromodulation with transcranial focused ultrasound. *Neurosurgical focus*,  
465 2018;44:E14.
- 466 Larrat B, Pernot M, Aubry JF, Dervishi E, Sinkus R, Seilhean D, Marie Y, Boch AL, Fink  
467 M, Tanter M. MR-guided transcranial brain HIFU in small animal models. *Physics in*  
468 *medicine & biology*, 2009;55:365.
- 469 Lee W, Chung YA, Jung Y, Song IU, Yoo SS. Simultaneous acoustic stimulation of human  
470 primary and secondary somatosensory cortices using transcranial focused ultrasound.  
471 *BMC neuroscience*, 2016a;17:68.
- 472 Lee W, Kim H, Jung Y, Song IU, Chung YA, Yoo SS. Image-guided transcranial fo-  
473 cused ultrasound stimulates human primary somatosensory cortex. *Scientific reports*,  
474 2015;5:8743.
- 475 Lee W, Kim HC, Jung Y, Chung YA, Song IU, Lee JH, Yoo SS. Transcranial focused ul-  
476 trasound stimulation of human primary visual cortex. *Scientific reports*, 2016b;6:34026.
- 477 Lee W, Lee SD, Park MY, Foley L, Purcell-Estabrook E, Kim H, Fischer K, Maeng LS,  
478 Yoo SS. Image-guided focused ultrasound-mediated regional brain stimulation in sheep.  
479 *Ultrasound in Medicine and Biology*, 2016c;42:459–470.
- 480 Legon W, Ai L, Bansal P, Mueller JK. Neuromodulation with single-element transcranial  
481 focused ultrasound in human thalamus. *Human brain mapping*, 2018a;39:1995–2006.
- 482 Legon W, Bansal P, Tyshynsky R, Ai L, Mueller JK. Transcranial focused ultrasound neu-  
483 romodulation of the human primary motor cortex. *Scientific Reports*, 2018b;8:10007.
- 484 Legon W, Sato TF, Opitz A, Mueller J, Barbour A, Williams A, Tyler WJ. Transcranial  
485 focused ultrasound modulates the activity of primary somatosensory cortex in humans.  
486 *Nature neuroscience*, 2014;17:322.

- 487 Lipsman N, Mainprize TG, Schwartz ML, Hynynen K, Lozano AM. Intracranial  
488 applications of magnetic resonance-guided focused ultrasound. *Neurotherapeutics*,  
489 2014;11:593–605.
- 490 Marsac L, Chauvet D, Larrat B, Pernot M, Robert B, Fink M, Boch AL, Aubry JF, Tanter  
491 M. Mr-guided adaptive focusing of therapeutic ultrasound beams in the human head.  
492 *Medical physics*, 2012;39:1141–1149.
- 493 Martin E, Werner B. Focused ultrasound surgery of the brain. *Current Radiology Reports*,  
494 2013;1:126–135.
- 495 Maxie MG. Jubb, Kennedy & Palmer's pathology of domestic animals. 5th Edition. Else-  
496 vier, Edinburgh, 2007. p. 300.
- 497 McDannold N, Maier SE. Magnetic resonance acoustic radiation force imaging. *Medical*  
498 *physics*, 2008;35:3748–3758.
- 499 Mohammadjavadi M, Gaur P, Kubanek J, Popelka G, Pauly KB. Transcranial focused  
500 ultrasound neuromodulation of the visual system in a large animal (sheep). In: 19th  
501 International Symposium on Therapeutic Ultrasound, Barcelona, 2019.
- 502 Monti MM, Schnakers C, Korb AS, Bystritsky A, Vespa PM. Non-invasive ultrasonic tha-  
503 lamic stimulation in disorders of consciousness after severe brain injury: a first-in-man  
504 report. *Brain Stimul*, 2016;9:940–941.
- 505 Mueller JK, Ai L, Bansal P, Legon W. Computational exploration of wave propagation  
506 and heating from transcranial focused ultrasound for neuromodulation. *Journal of neural*  
507 *engineering*, 2016;13:056002.



- 508 Mueller JK, Ai L, Bansal P, Legon W. Numerical evaluation of the skull for human  
509 neuromodulation with transcranial focused ultrasound. *Journal of neural engineering*,  
510 2017;14:066012.
- 511 Naor O, Krupa S, Shoham S. Ultrasonic neuromodulation. *Journal of neural engineering*,  
512 2016;13:031003.
- 513 Rao MG, Singh D, Vashista RK, Sharma SK. Dating of acute and subacute subdural haem-  
514 orrhage: a histo-pathological study. *Journal of clinical and diagnostic research: JCDR*,  
515 2016;10:HC01.
- 516 Tyler WJ, Lani SW, Hwang GM. Ultrasonic modulation of neural circuit activity. *Current*  
517 *opinion in neurobiology*, 2018;50:222–231.
- 518 Verhagen L, Gallea C, Folloni D, Constans C, Jensen DE, Ahnine H, Roumazeilles L,  
519 Santin M, Ahmed B, Lehericy S, et al. Offline impact of transcranial focused ultrasound  
520 on cortical activation in primates. *Elife*, 2019;8:e40541.
- 521 Vyas U, Ghanouni P, Halpern CH, Elias J, Pauly KB. Predicting variation in subject  
522 thermal response during transcranial magnetic resonance guided focused ultrasound  
523 surgery: Comparison in seventeen subject datasets. *Medical physics*, 2016;43:5170–  
524 5180.
- 525 Vyas U, Kaye E, Pauly KB. Transcranial phase aberration correction using beam simula-  
526 tions and mr-arfi. *Medical physics*, 2014;41.

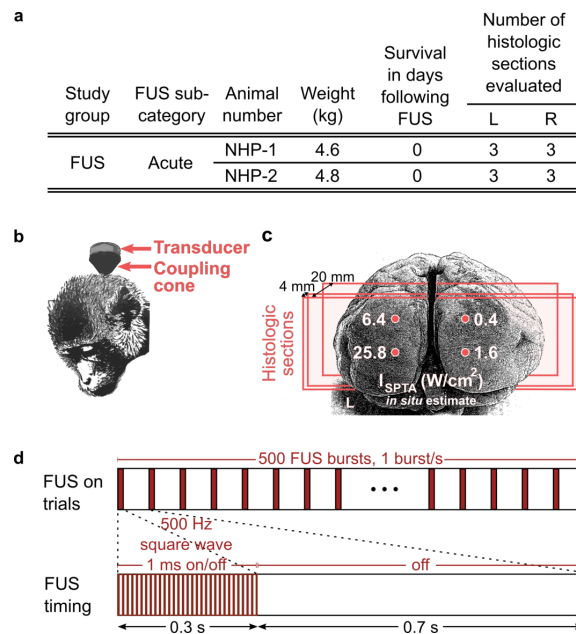

Figure 1: Summary of rhesus macaque study parameters. (a) Inclusion characteristics, survival time, and number of histologic samples evaluated for left (L) and right (R) hemispheres. (b) Illustration of rhesus macaque transducer positioning and (c) grid of focused ultrasound sonication in the visual cortex, where each location corresponds to estimated *in situ* spatial peak-temporal average intensity ( $I_{SPTA}$ ) values of 0.4, 1.6, 6.4, and 25.8  $W/cm^2$ , applied in short bursts. Vertical spacing between FUS targets was 10 mm (NHP-1) and 15 mm (NHP-2), and horizontal spacing was 15 mm (NHP-1) and 20 mm (NHP-2). The lower two target locations (1.6 and 25.8  $W/cm^2$   $I_{SPTA}$ ) were placed 2 mm above theinion. Three coronal histologic sections were obtained from each hemisphere of the visual cortex (approximate locations shown by red planes). The first histology plane was located near the cortical surface, the second at a depth of approximately 4 mm, and the third at a depth of approximately 20 mm. (d) Illustration of neuromodulation protocol comprising 500 FUS bursts.

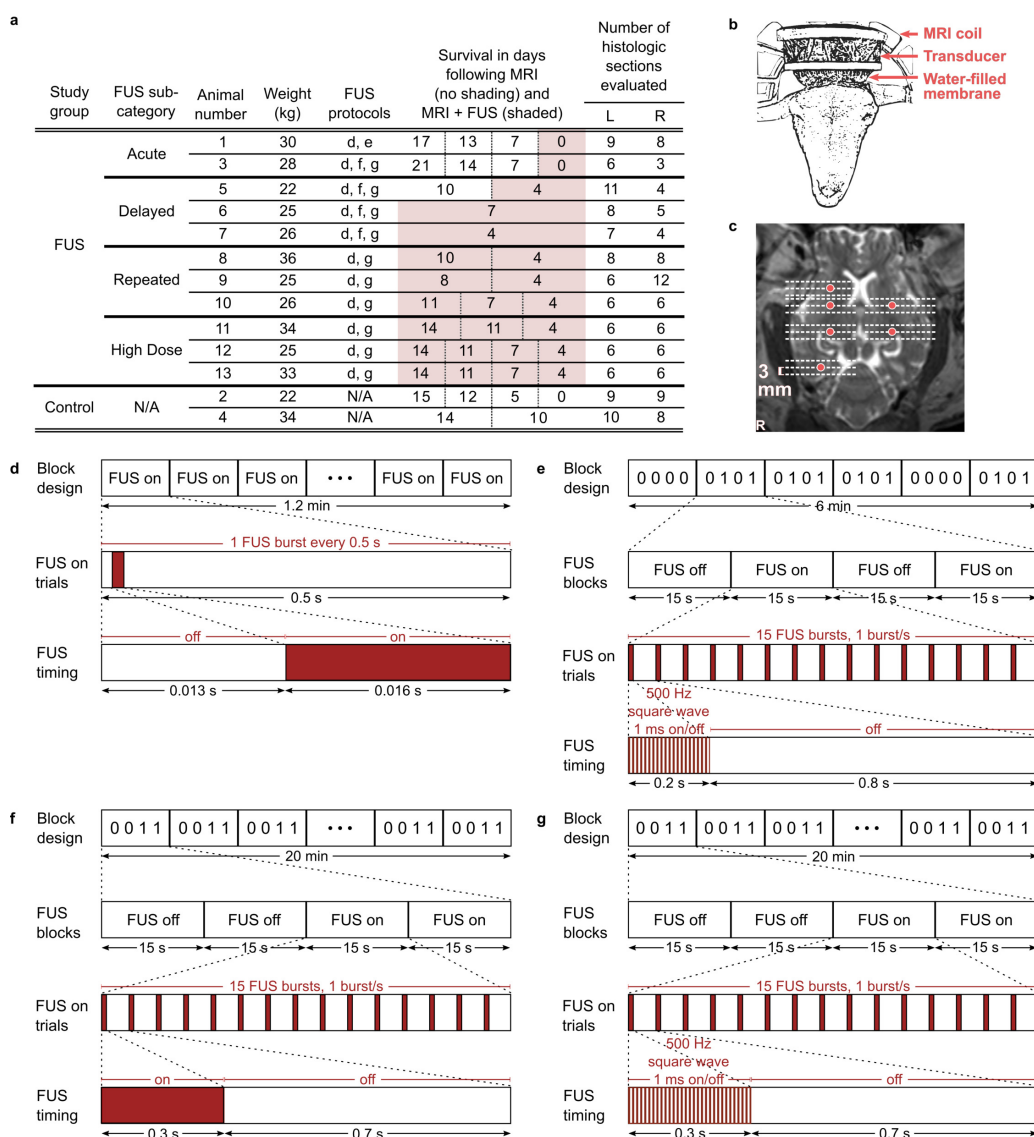

Figure 2: Summary of sheep study parameters. (a) Sheep inclusion characteristics. The two sheep in the control group underwent MRI and anesthesia but no FUS. The eleven sheep that underwent FUS were subdivided into acute (euthanized zero days after FUS study), delayed (euthanized four to seven days after FUS study), repeated (underwent multiple FUS sessions, and euthanized four days after the last FUS study), and high dose groups (underwent prolonged MR-ARFI applications at one location on the last day of study). Days of survival following the first (left-most) and subsequent days of study are reported in split columns where applicable, for MRI without FUS (unshaded cells) and MRI with FUS sessions (shaded cells). The number of evaluated histologic sections is directly related to the number of FUS targets per sheep. (b) Sheep transducer positioning and (c) exemplary focused ultrasound sonication locations (6 locations shown; red circles) shown on axial T2-weighted MRI (cropped to show detail). Histologic sections were obtained from each location targeted with focused ultrasound and additionally from planes approximately 3 mm rostral and caudal to targeted locations (18 sections shown; dashed lines). Illustration of (d) MR-ARFI focal spot localization and (e-g) neuromodulation FUS protocols. Protocols comprised (d) 128, (e) 120 and (f-g) 600 FUS bursts.

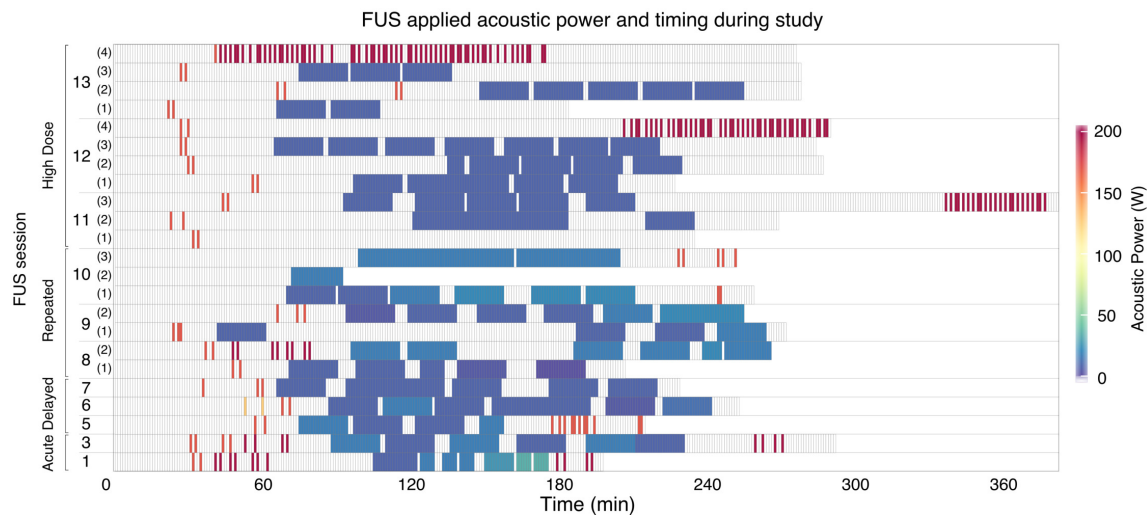

Figure 3: *In vivo* sheep study parameters. FUS applied acoustic power over time for each animal. Timing spans the total MRI and FUS session. Each cell represents a one minute interval, with color coding to indicate non-zero FUS acoustic powers. Empty cells indicate no FUS.

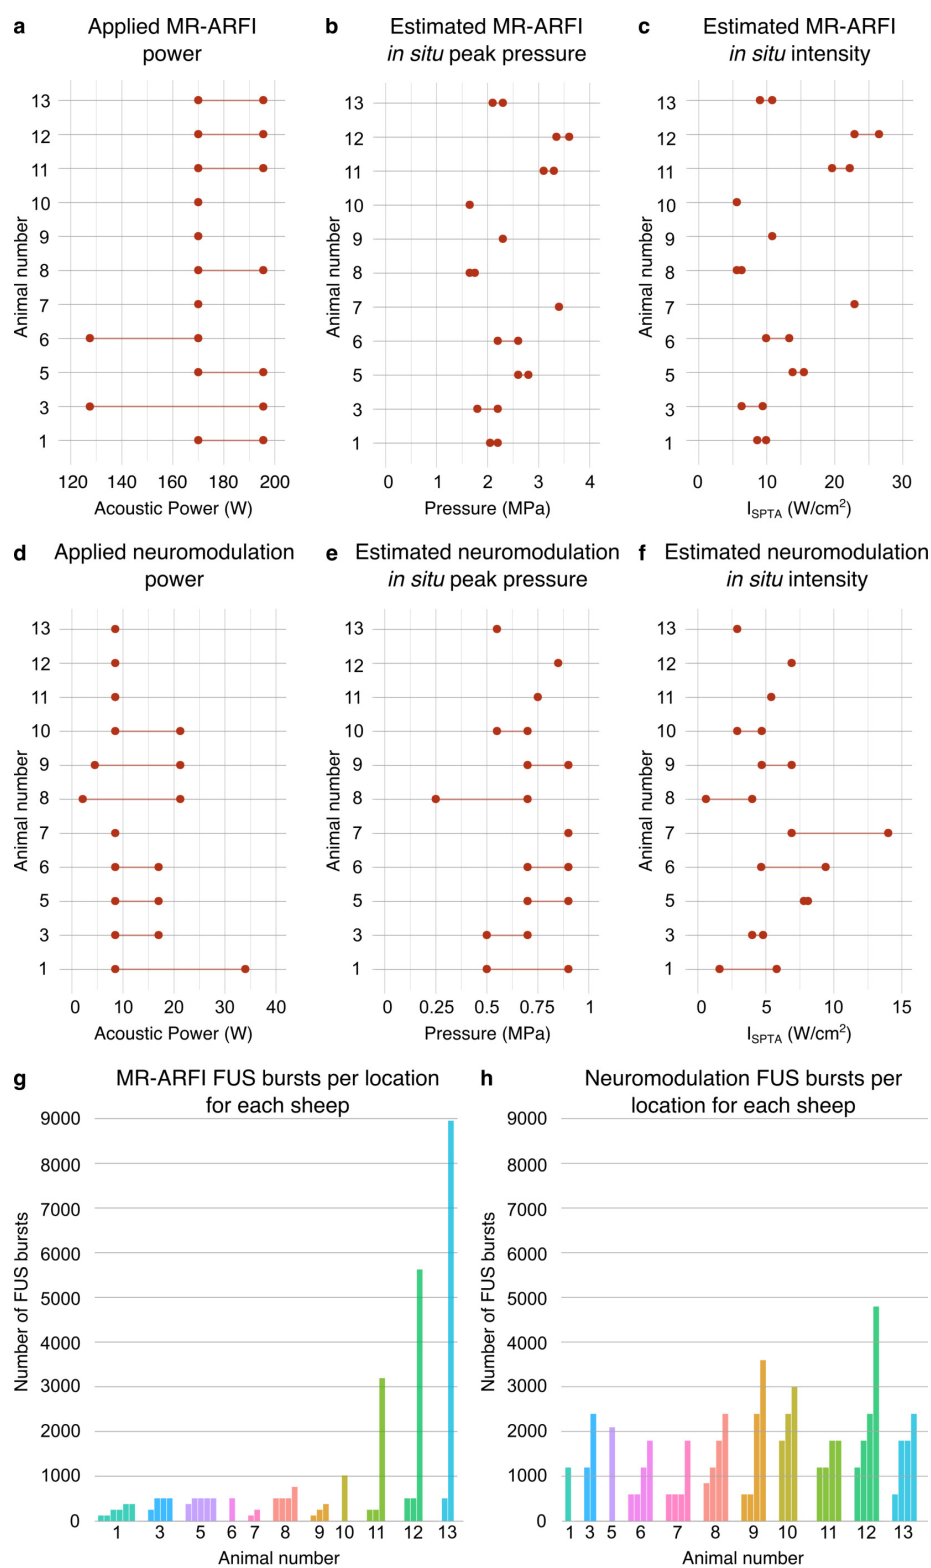

Figure 4: *In vivo* sheep study parameters. (a,d) Range of applied acoustic powers and estimated *in situ* (b,e) peak pressure and (c,f) spatial peak temporal average intensity for MR-ARFI and neuromodulation, respectively. Total number of FUS bursts applied to each (g) MR-ARFI and (h) neuromodulation location, where animal number is reported below each bar cluster. Individual bars represent unique sonication locations, and bar height indicates number of FUS bursts delivered to that location.

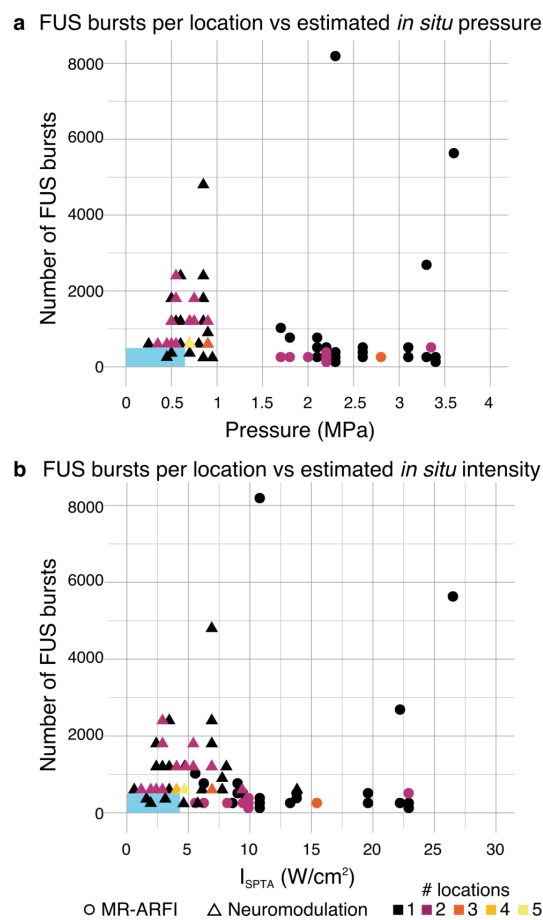

Figure 5: Distribution of the number of FUS bursts applied to each location with respect to the estimated *in situ* (a) peak pressure and (b) intensity of each sonication. MR-ARFI sonications (circles) were estimated to have *in situ* peak pressure between 1.7 and 3.6 MPa, which, due to the short 16 ms sonication times, corresponded to between 5.6 and 26.5 W/cm<sup>2</sup>  $I_{SPTA}$ . Neuromodulation sonications (triangles) were estimated to have peak *in situ* pressure between 0.25 and 0.9 MPa, corresponding to 0.6 and 13.8 W/cm<sup>2</sup>  $I_{SPTA}$ . The color scale indicates the number of locations at which each combination of *in situ* pressure or intensity and number of FUS bursts was observed. Blue rectangles indicate the range of parameters reported in human neuromodulation studies.

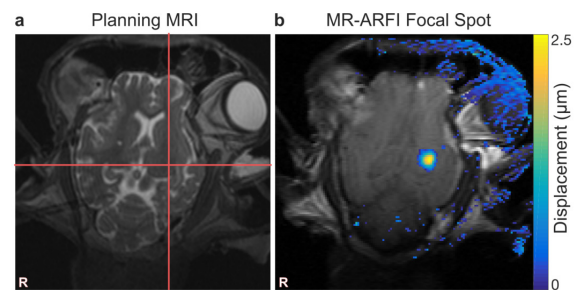

Figure 6: Focal spot targeting and visualization. (a) Prescribed focal spot is indicated by red cross hairs drawn on T2-weighted MRI. (b) Tissue displacement at the focal spot is shown as an overlay on the MR-ARFI magnitude image. Stray pixels in the displacement map outside the brain are artifact due to slight changes between two MR-ARFI acquisitions.

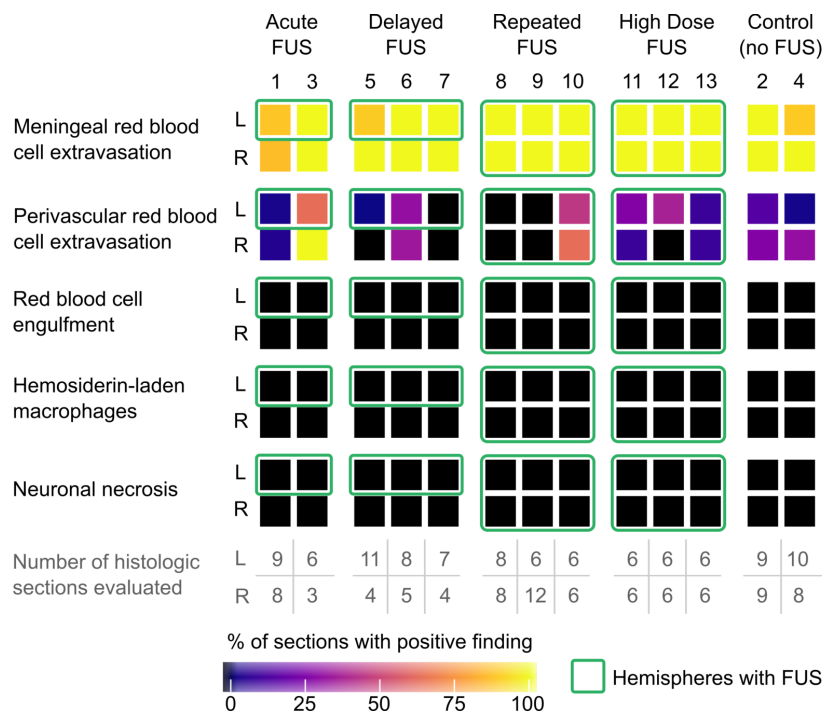

Figure 7: Prevalence of histologic findings within *in vivo* sheep study. The percentage of sections in which histologic findings were observed are reported for each animal by hemisphere (L and R; animal number listed at the top of each column). The number of histologic sections evaluated are reproduced from Fig. 2(a) for convenience. Green boxes indicate hemispheres where focused ultrasound was applied (all other boxes are internal controls or experimental controls). Meningeal and rare perivascular red blood cell extravasation were common histologic findings across all study groups, independent of whether any FUS was applied or which hemisphere was sonicated (in the case of FUS application). Necrosis, macrophage infiltration, red blood cell engulfment (erythrophagocytosis), and intracellular red blood cell breakdown (hemosiderin-laden macrophages), which would be expected to accompany true pre-mortem tissue damage, were not observed.



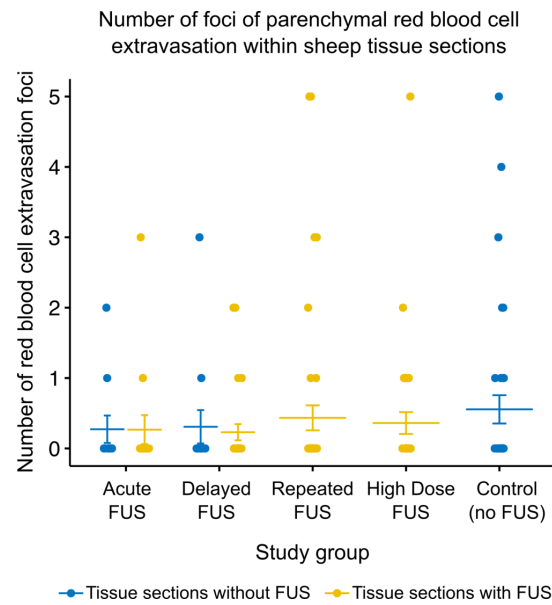

Figure 8: Summary of parenchymal red blood cell extravasation foci in H&E-stained sheep brain tissue slides. The number of foci per slide are shown for tissue taken from hemispheres without FUS (blue dots) and hemispheres with FUS (yellow dots) for each study group where applicable. Bars indicate mean and standard error.

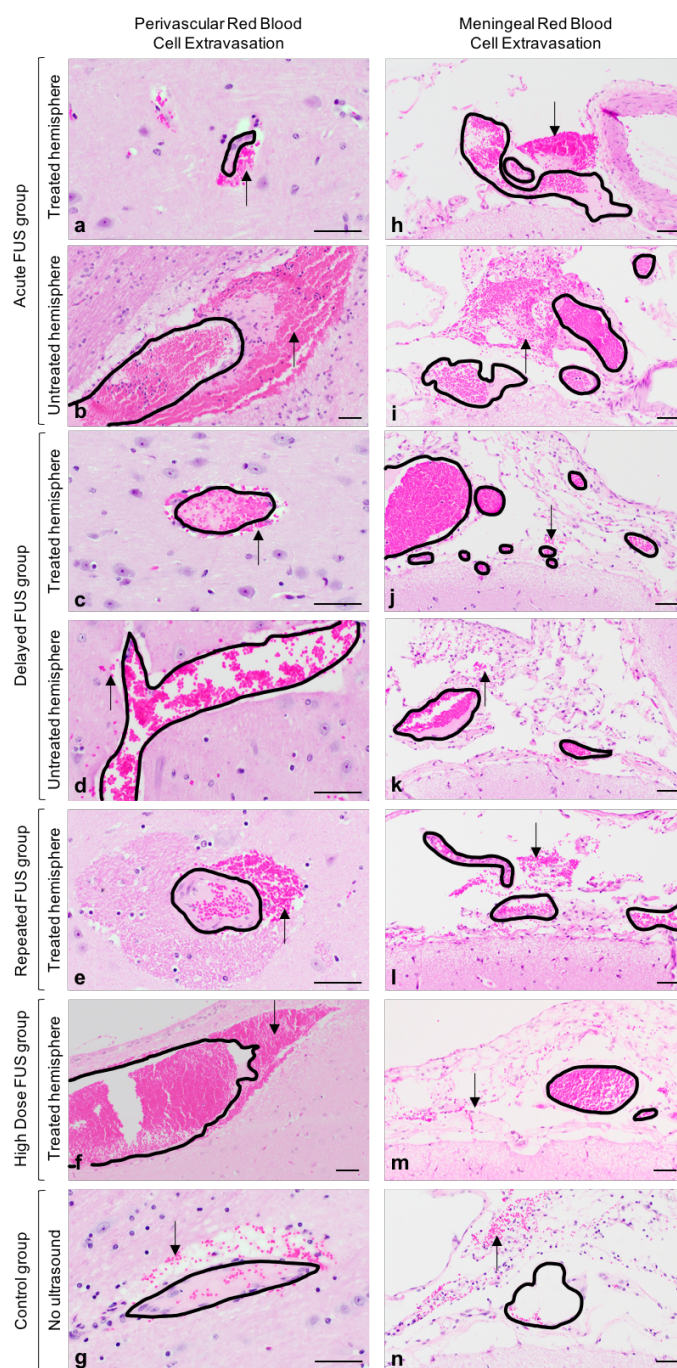

Figure 9: Post-mortem perivascular and meningeal red blood cell extravasation does not differ across sheep treatment groups. Randomly scattered small volumes of extravasated red blood cells (black arrows) were identified adjacent to blood vessels within the neural parenchyma (a-g) and throughout the meninges (h-n) regardless of ultrasound exposure. Black outlines indicate blood vessel walls and delineate intravascular from extravascular red blood cells. No red blood cell extravasation was observed at parenchymal locations targeted with FUS. No associated pre-mortem tissue reactions (*i.e.*, red blood cell engulfment (erythrophagocytosis), red blood cell breakdown (hemosiderosis), necrosis, or edema) were identified in any of the examined sections. Hematoxylin and eosin, scale bar = 50  $\mu$ m.

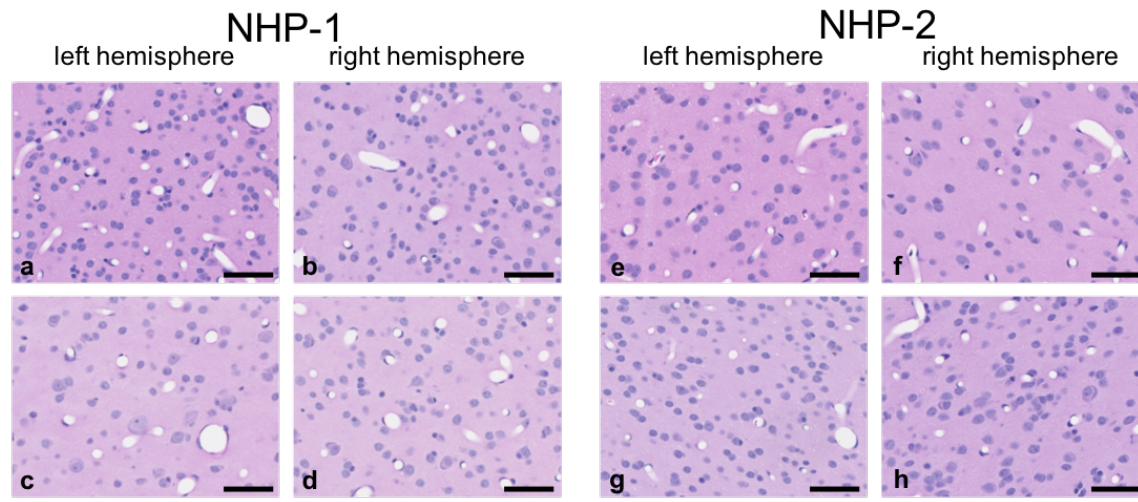

Figure S1: Histologic findings within *in vivo* NHP study. No histologic lesions were identified in NHP-1 (a-d) or NHP-2 (e-h). Representative normal cortical tissue is shown from FUS targeted regions corresponding to those shown in Figure 1. Hematoxylin and eosin, scale bar = 50  $\mu\text{m}$ .

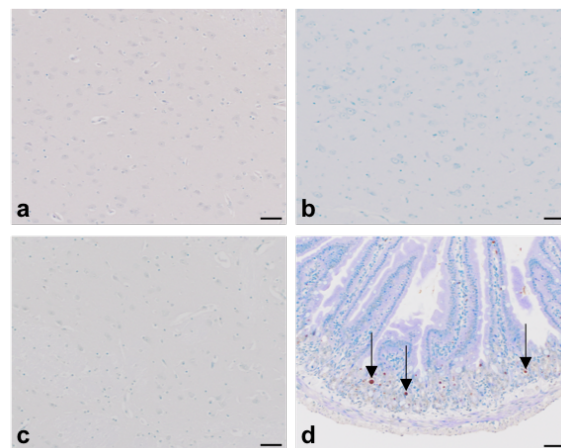

Figure S2: TUNEL staining in sheep in the high dose FUS group. Sheep 11 (a), 12 (b), and 13 (c) were TUNEL-negative at the targeted site of prolonged MR-ARFI repetitions. Figure d demonstrates apoptotic dark-brown, nuclear TUNEL-positivity (arrows) within the small intestinal epithelium of mice having undergone irradiation. TUNEL, scale bar = 50  $\mu\text{m}$ .
